# Supplementary material for: A metastable molecular array guided by the synergy of confinement and charge repulsion for piezochromic sensors
Source: Royal Society of Chemistry journal article supplement (doi:10.1039/d3tc00545c), 2023-01-01
Supplement: d3tc00545c1.pdf [file d3tc00545c1.pdf]

## Supporting Information

### **Metastable Molecular Array Guided by the Synergy of Confinement and Charge Repulsion for Piezochromic Sensor**

*Jing Liu,<sup>1</sup> Ruixing Wang,<sup>1</sup> Xinrui Wang,<sup>2</sup> Kaixiang Liang,<sup>1</sup> Wenying Shi,<sup>1\*</sup> Chao Lu<sup>1</sup>*

<sup>1</sup>State Key Laboratory of Chemical Resource Engineering, Beijing University of Chemical Technology, 15 Beisanhuan East Road, P. Box 98, 100029, Beijing (P. R. China).

\*E-mail: shiwy@mail.buct.edu.cn

<sup>2</sup>College of chemistry and materials engineering, Key Laboratory of Cosmetic, China National Light Industry, Beijing Technology and Business University, Beijing 100048, China.

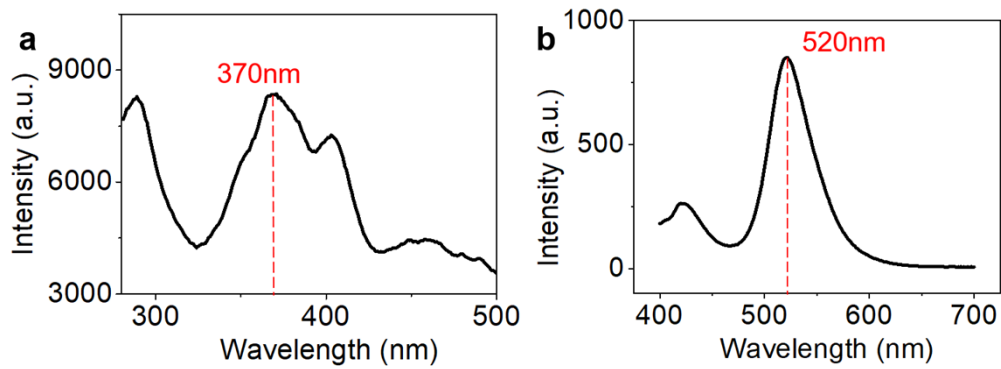

**Supplementary Figure 1.** The fluorescent (a) excitation and (b) emission spectrum of HPTS-LDH@PVA film.

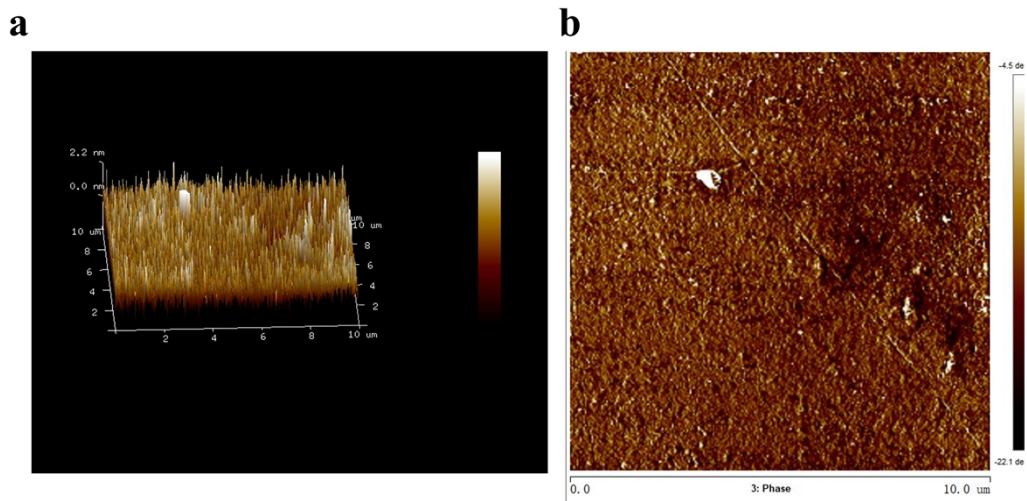

**Supplementary Figure 2.** (a) The 3D and (b) 1D of tapping-mode AFM topographical images of the HPTS-LDH@PVA film.

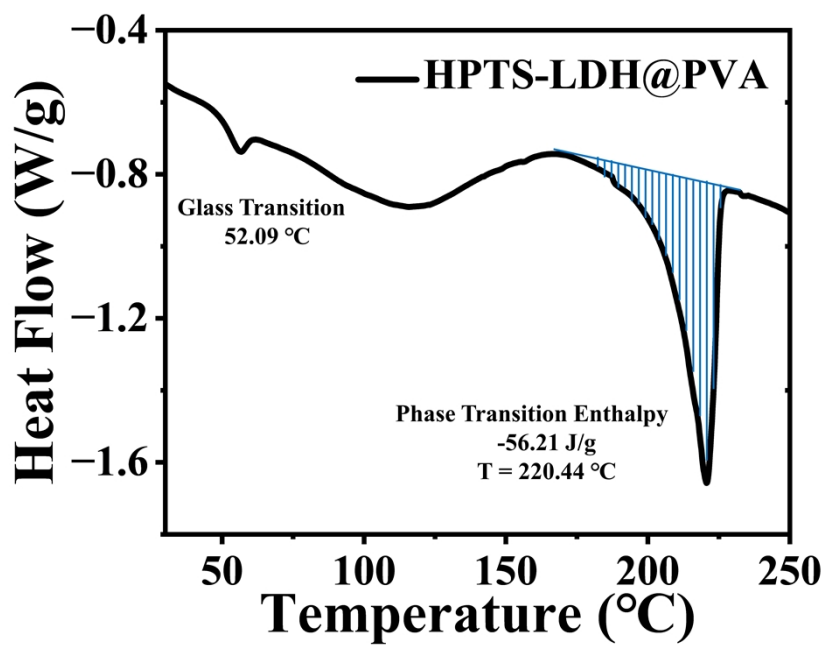

Supplementary Figure 3. Heat flow-temperature relationship of HPTS-LDH@PVA.

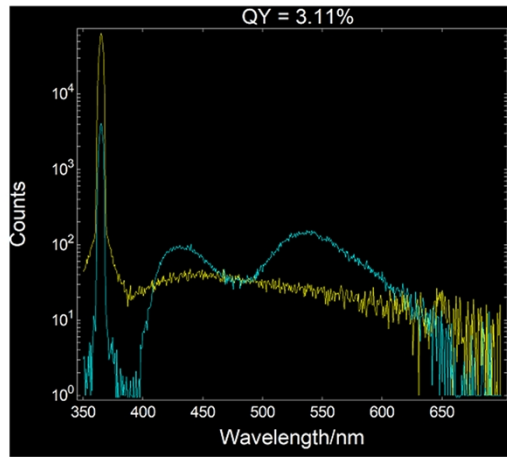

**Supplementary Figure 4.** Quantum efficiency of HPTS-LDH@PVA film before pressure.

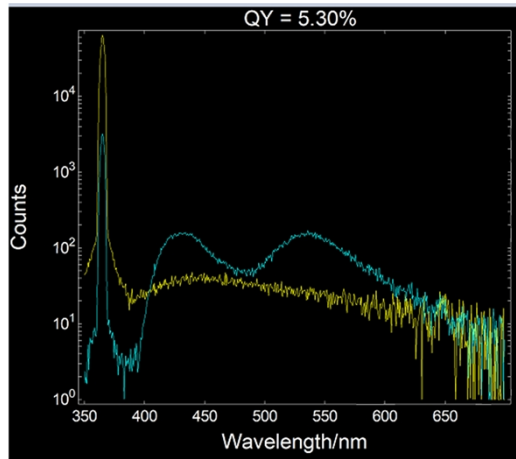

**Supplementary Figure 5.** Quantum efficiency of HPTS-LDH@PVA film after pressure.

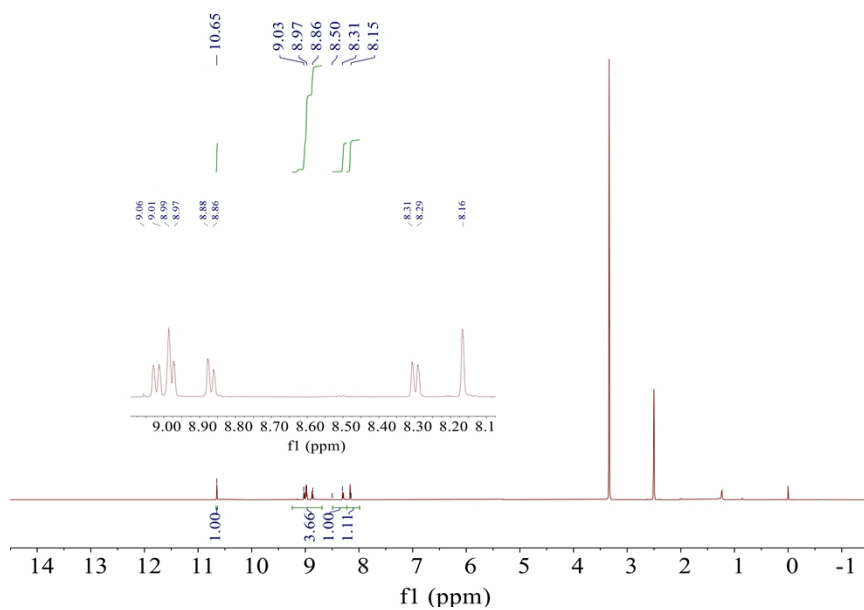

**Supplementary Figure 6.**  $^1\text{H}$  NMR spectrum. The spectrum of HPTS molecule was collected in  $\text{DMSO-}d_6$  under ambient conditions.

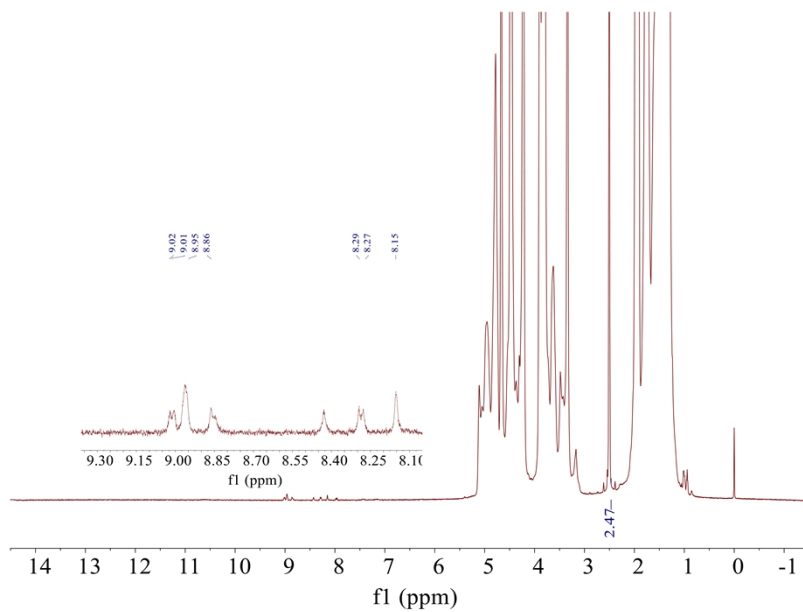

**Supplementary Figure 7.** <sup>1</sup>H NMR spectrum of HPTS-LDH@PVA film in DMSO-*d*<sub>6</sub>.



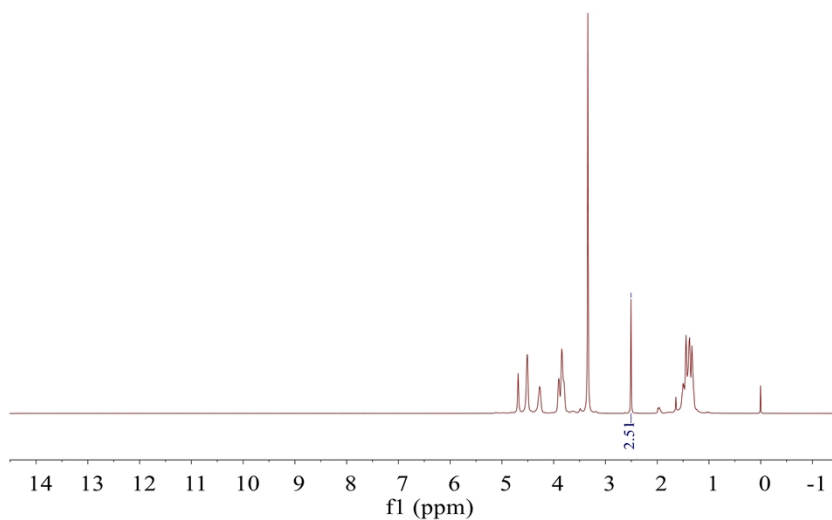

**Supplementary Figure 8.**  $^1\text{H}$  NMR spectrum of PVA film in  $\text{DMSO-}d_6$ .

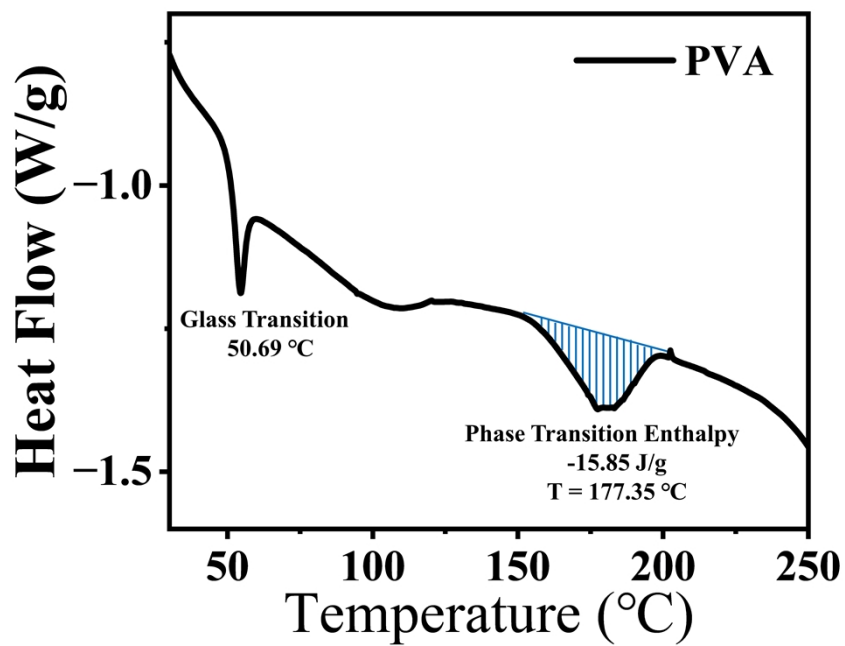

Supplementary Figure 9. Heat flow-temperature relationship of PVA.

**Supplementary Table 1.** The ICP-MS results of NO<sub>3</sub>-LDH, the calculated ratio of Mg/Al and corresponding chemical formula.

| LDH                  | Mg (ppm) | Al (ppm) | Mg/Al | [Mg <sub>a</sub> Al <sub>b</sub> (OH) <sub>x</sub> ](A <sup>n-</sup> ) <sub>y</sub> ·zH <sub>2</sub> O |          |
|----------------------|----------|----------|-------|--------------------------------------------------------------------------------------------------------|----------|
|                      |          |          |       | <i>a</i>                                                                                               | <i>b</i> |
| NO <sub>3</sub> -LDH | 3.88     | 1.39     | 3.18  | 0.76                                                                                                   | 0.24     |

**Supplementary Table 2.** Elemental analysis results of HPTS-LDH and the calculated weight fraction of HPTS in HPTS-LDH.

| Batches    | S (wt.%) | HPTS (wt.%) | average of HPTS (wt.%) |
|------------|----------|-------------|------------------------|
| HPTS-LDH-1 | 5.21     | 24.7        |                        |
| HPTS-LDH-2 | 5.15     | 24.4        | 24.6                   |
| HPTS-LDH-3 | 5.23     | 24.8        |                        |

**Supplementary Table 3.** The fluorescence decay curve of the original, compressed and recovered HPTS-LDH@PVA.

| Sample     | $\tau_1$ (ns) | A <sub>1</sub> (%) | $\tau_2$ (ns) | A <sub>2</sub> (%) | $\chi^2$ | $\tau_{ave}$ (ns) |
|------------|---------------|--------------------|---------------|--------------------|----------|-------------------|
| original   | 1.938         | 54.31              | 7.198         | 45.69              | 1.246    | 4.29              |
| compressed | 1.922         | 44.82              | 7.517         | 55.18              | 1.262    | 4.99              |
| recovered  | 1.936         | 52.14              | 7.402         | 47.86              | 1.114    | 4.48              |

**Supplementary Table 4.** The fluorescence decay curve of the original, compressed and recovered HPTS@PVA.

| Sample     | $\tau_1$ (ns) | A <sub>1</sub> (%) | $\tau_2$ (ns) | A <sub>2</sub> (%) | $\chi^2$ | $\tau_{ave}$ (ns) |
|------------|---------------|--------------------|---------------|--------------------|----------|-------------------|
| original   | 0.67          | 59.12              | 4.32          | 40.88              | 0.952    | 2.12              |
| compressed | 0.61          | 51.80              | 4.17          | 48.2               | 1.012    | 2.31              |
| recovered  | 0.64          | 58.24              | 4.26          | 41.8               | 0.936    | 2.14              |
